1 **RodZ modulates geometric localization of the bacterial actin MreB to**  
2 **regulate cell shape**

3

4 Alexandre Colavin<sup>1,\*</sup>, Handuo Shi<sup>2,\*</sup>, Kerwyn Casey Huang<sup>1,2,3,†</sup>

5

6 <sup>1</sup>Biophysics Program, Stanford University, Stanford, CA 94305, USA

7 <sup>2</sup>Department of Bioengineering, Stanford University, Stanford, CA 94305, USA

8 <sup>3</sup>Department of Microbiology and Immunology, Stanford University, Stanford, CA  
9 94305, USA

10

11 \*These authors contributed equally.

12

13 †Corresponding author:

14 Kerwyn Casey Huang

15 Stanford University, Department of Bioengineering

16 443 Via Ortega

17 Shriram Center, Room 007

18 Stanford, CA 94305, USA

19 Phone: (650) 721-2483

20 Email: [kchuang@stanford.edu](mailto:kchuang@stanford.edu)

21 **Abstract**

22

23 In the rod-shaped bacterium *Escherichia coli*, the actin-like protein MreB  
24 localizes in a curvature-dependent manner and spatially coordinates cell-wall  
25 insertion to maintain cell shape across changing environments, although the  
26 molecular mechanism by which cell width is regulated remains unknown. Here,  
27 we demonstrate that the bitopic membrane protein RodZ regulates the  
28 biophysical properties of MreB and alters the spatial organization of *E. coli* cell-  
29 wall growth. The relative expression levels of MreB and RodZ changed in a  
30 manner commensurate with variations in growth rate and cell width. We carried  
31 out single-cell analyses to determine that RodZ systematically alters the  
32 curvature-based localization of MreB and cell width in a manner dependent on  
33 the concentration of RodZ. Finally, we identified MreB mutants that we predict  
34 using molecular dynamics simulations to alter the bending properties of MreB  
35 filaments at the molecular scale similar to RodZ binding, and showed that these  
36 mutants rescued rod-like shape in the absence of RodZ alone or in combination  
37 with wild-type MreB. Together, our results show that *E. coli* controls its shape  
38 and dimensions by differentially regulating RodZ and MreB to alter the patterning  
39 of cell-wall insertion, highlighting the rich regulatory landscape of cytoskeletal  
40 molecular biophysics.

41 **Introduction**

42

43 Bacterial shape is determined by the cell wall, a cross-linked sugar network that  
44 is constantly remodeled as cells grow [1, 2]. In several rod-shaped organisms,  
45 cell-wall insertion is controlled by the cytoskeletal protein MreB [3, 4], a structural  
46 homolog of eukaryotic actin [5]. In *E. coli*, MreB forms oligomers [6] that bind the  
47 inner surface of the cytoplasmic membrane [7], rotate around the cell's long axis  
48 in a manner that is dependent on activity of the essential cell-wall synthesis  
49 enzyme PBP2 [6, 8], and control the spatiotemporal pattern of cell-wall insertion  
50 [5, 9-11]. Disruption of MreB through point mutations [12-15], depletion [16],  
51 overexpression [16, 17], or antibiotics [16, 18, 19] can lead to subtle size  
52 changes or aberrant morphological phenotypes. Quantification of the pattern of  
53 MreB fluorescence as a function of geometry in exponentially growing cells [11]  
54 or in cell wall-deficient spheroplasts [20] revealed that MreB preferentially  
55 localizes to invaginations of the cell surface. Molecular dynamics simulations  
56 predicted that MreB polymers have nucleotide-dependent intrinsic curvature and  
57 substantial resistance to bending [21], both of which are key ingredients for  
58 sensing curvature. Moreover, simulations based on a mechanochemical model of  
59 cell-wall growth demonstrated that preferential localization to regions of negative  
60 Gaussian curvature is sufficient to straighten a bent cell [11]. Thus, biophysical  
61 feedback between cell shape and MreB-mediated wall growth appears to be  
62 crucial for cell-shape maintenance, although it remains unknown whether *E. coli*

63 cells actively regulate the biophysical properties of MreB polymers to adjust cell  
64 shape and size.  
65  
66 *E. coli* cell shape has long been recognized to vary across growth phases, with  
67 cells becoming shorter as population optical density increases past ~0.3; cells  
68 become nearly round in stationary phase [22]. Moreover, the steady-state cellular  
69 dimensions of many rod-shaped bacteria adjust in response to nutrient-  
70 determined changes in growth rate [23, 24], with faster-growing cells having  
71 increased volume. The molecular mechanisms underlying changes in length and  
72 width are only partially understood, and there may be several pathways that  
73 indirectly affect cell size [24-26]. Nonetheless, mutation of a single residue of  
74 MreB to various amino acids was sufficient to drive a wide range of cell-size  
75 changes and to increase competitive fitness via decreases in lag time [14],  
76 suggesting that modification of MreB is a robust mechanism for determining  
77 cellular dimensions and thereby altering cellular physiology. Chemical inhibition  
78 of MreB polymerization by sublethal levels of the small molecule A22 resulted in  
79 dose-dependent changes to cell width and the chirality of cell-wall architecture  
80 [3], indicating that MreB polymeric properties may be biophysical parameters that  
81 can be exploited by the cell as tuning knobs for regulating cell width. How the  
82 geometric sensing function of MreB – which we define as MreB localization in  
83 response to morphological features such as surface curvature – is connected  
84 with cell size has not been systematically investigated. To elucidate the precise  
85 relationship between the molecular biophysics of the MreB cytoskeleton and the

86 diverse landscape of cell shape requires both molecular structural investigations  
87 and precise single-cell experiments.

88

89 Here, we establish that the spatial organization of MreB in *E. coli* changes  
90 systematically across phases of growth, suggesting that the biophysical  
91 properties of MreB filaments alter in a manner commensurate with the nutrient-  
92 regulated changes in growth rate. Using single-cell microscopy, we determined  
93 that the protein RodZ [17, 27, 28] regulates the geometric sensing of MreB.

94 Molecular dynamics simulations prompted us to propose that RodZ binding  
95 directly alters the conformational dynamics and intrinsic curvature of MreB  
96 polymers. We studied several MreB mutations that complement rod-like shape in  
97 the absence of RodZ when expressed alone or in combination with wild-type  
98 MreB (MreB<sup>WT</sup>). These mutants display enrichment of MreB to curvatures distinct  
99 from wild-type cells, and result in longer polymers. Simulations predict that these  
100 MreB mutations alter polymer bending dynamics in a manner consistent with the  
101 behavior of wild-type MreB bound to RodZ. Together, our findings demonstrate  
102 that regulation of RodZ tunes the geometric localization of MreB and thereby  
103 alters cell shape.

104 **Results**

105

106 ***E. coli* cells rapidly change size as nutrients are depleted**

107 Based on previous reports that *E. coli* cell mass decreases dramatically as the  
108 population increases beyond an optical density of ~0.3 [22], we hypothesized that  
109 passage through a typical growth curve would yield insights into the mechanisms  
110 of cell-size determination across a range of cell sizes in a single genotypic  
111 background. We interrogated a strain expressing the *mreBCD* operon under  
112 control of the native promoter on a plasmid, with a sandwich fusion of MreB to  
113 monomeric superfolder GFP (msfGFP) [11]. To monitor cell shape as a function  
114 of cell density, we back-diluted a 24-h, stationary-phase culture grown in  
115 lysogeny broth (LB) 1:200 into fresh LB in a test tube. Every 15 min, we extracted  
116 a small sample and imaged cells on an agarose pad with phase-contrast and  
117 epifluorescence microscopy to measure cell shape and MreB localization  
118 (Methods). We extracted cell contours [11, 14] and computed the mean length  
119 and width of the population at each time point (Methods). Concurrently, we  
120 measured optical density from a parallel culture to quantify bulk growth rate (Fig.  
121 1a).

122

123 Along the growth curve of the cell culture's exit from stationary phase, the mean  
124 cell length and width of the population rapidly changed. Within 1 h, there was a  
125 detectable increase in both mean width and length (Fig. 1b). Changes in width  
126 and length were not synchronized, with width initially increasing for the first 45

127 min, followed by a gradual decrease back to a value typical of stationary-phase  
128 cultures ( $\sim 1 \mu\text{m}$ ) over the growth curve (Fig. 1b). In contrast, length continuously  
129 increased for the first 1.5 h, plateaued for 45 min, and then gradually decreased  
130 (Fig. 1b). The cell population had not reached stationary-phase dimensions after  
131 3 h, as the culture was still growing at a slow rate (Fig. 1a). Similar changes to  
132 cellular dimensions occurred in wild-type (unlabeled MreBCD at the native  
133 chromosomal locus) *E. coli* MG1655 cells (Fig. S1). Thus, cellular dimensions  
134 change in an asynchronous, nontrivial manner as nutrients are consumed,  
135 providing the opportunity to reveal connected changes in the behavior of the  
136 molecular mechanisms that construct the cell wall and determine shape.

137

### 138 **Curvature-based enrichment of MreB varies with cell density**

139 To correlate MreB localization with features of a cell's shape, we computed two  
140 curvature-related features at every point along the contour. Contour curvature  
141 describes bending along the cell outline (Fig. 1c). By our convention, the poles  
142 are regions of high positive contour curvature (small blue circle, Fig. 1c), while  
143 invaginations such as division-site constrictions are regions of high negative  
144 contour curvature (red circle, Fig. 1c). Although most of the cell away from the  
145 poles is approximately cylindrical, there are fluctuations in contour curvature  
146 (large blue circle, Fig. 1c) that we previously exploited to determine that MreB  
147 preferentially localizes to regions of negative contour curvature during  
148 exponential growth [11, 20]. The second curvature feature captures the local  
149 width, which is the distance of closest approach to the cell midline. We defined

150 the inverse of this distance as the radial curvature (Fig. 1d), which approximates  
151 the out-of-plane curvature along the circumferential direction under the  
152 assumption of cylindrical symmetry. Thus, as cell width changes throughout the  
153 growth curve, straight regions have zero contour curvature regardless of cell  
154 width and smaller or larger radial curvature as cell width increases or decreases,  
155 respectively.

156

157 Throughout the growth curve after exit from stationary phase, cells adopted wide  
158 distributions of contour and radial curvatures (Fig. 1e). We computed the  
159 enrichment of MreB fluorescence as a function of contour and radial curvature  
160 across thousands of cells at each time point (Fig. S2). First, we calculated the  
161 distribution of curvatures as a two-dimensional histogram with fixed bin widths  
162 and bin positions for all cells in a given sample. Next, for each curvature bin, the  
163 intensity values of MreB localized at curvature values between the bin edges  
164 were averaged and normalized by the average fluorescence expected under the  
165 null hypothesis that MreB was randomly distributed along the contour of each  
166 cell. At 1.5 h, MreB was generally localized to negative contour curvature, as  
167 expected (Fig. 1f). However, the specific shape of the enrichment profile  
168 depended on the local radial curvature: MreB was more likely to be found at  
169 wider regions with negative contour curvature (Fig. 1f). Simulated microscopy  
170 [29] showed that this width-dependent enrichment could not be accounted for by  
171 optical artifacts due to the variable cell width (Fig. S3). Thus, for a fixed contour  
172 curvature, MreB prefers wider regions of the cell.



173

174 By contrast, at  $t = 0$  (the beginning of the exit from stationary phase), MreB  
175 displayed a qualitatively distinct enrichment profile. Most notably, in the shorter  
176 and thinner stationary-phase cells (Fig. 1e, S2), MreB localized preferentially to  
177 the poles (high positive contour curvature) (Fig. 1f). Since the spatiotemporal  
178 patterns of MreB and of new cell-wall synthesis are highly correlated [11], this  
179 polar localization during stationary phase is consistent with our observation of  
180 rapid cell widening as cells exit stationary phase (Fig. 1b). To examine how the  
181 enrichment profile varied over time, we compressed the two-dimensional  
182 curvature into an approximate measure of the mean curvature (computed as the  
183 average of contour and radial curvature), binned mean curvatures into a one-  
184 dimensional histogram, and recomputed the observation-weighted average of  
185 MreB enrichment as a function of mean curvature (Fig. 1g). To estimate the  
186 confidence of enrichment measurements, the enrichment profile was calculated  
187 10 times from data bootstrapped from the original dataset with replacement, and  
188 the standard deviation of enrichment across resampled datasets was calculated  
189 for each bin. MreB localization was initially enriched in regions of high mean  
190 curvature (cell poles), but steadily decreased at later time points (Fig. 1h). Across  
191 the entire time course after the initial measurement ( $t = 0$ ), there was a consistent  
192 enrichment of MreB at lower mean curvature (negative contour curvature).  
193 However, the enrichment profile varied quantitatively throughout the growth  
194 curve, with variations in enrichment on similar time scales as the changes in  
195 cellular dimensions (Fig. 1b). For example, cell width and length (Fig. 1b) were

196 relatively constant between ~60 and 90 min, as was MreB enrichment (Fig. 1h).  
197 Moreover, MreB enrichment continued to change throughout the 3-h time course,  
198 as did cellular dimensions (Fig. 1b). Thus, MreB curvature sensing and cell  
199 shape both change dramatically as cells exit from stationary phase. Given the  
200 relationship between MreB and patterning of the insertion of cell wall material, we  
201 hypothesized that a direct relationship exists between curvature sensing and cell  
202 shape.

203

#### 204 **Expression of RodZ alters MreB curvature enrichment**

205 The large, systematic changes in MreB curvature-based localization suggest that  
206 molecular factors could be responsible for altering the subcellular behavior of  
207 MreB. Based on evidence from previous studies, a strong candidate for the  
208 regulation of MreB patterning is the bitopic membrane protein RodZ [17, 27, 28].  
209 In *E. coli*, deletion of RodZ causes cells to become round [17, 28]. Changes to  
210 RodZ levels also tune cell shape: both underexpression and overexpression  
211 increase cell width, and overexpression also results in larger width variations  
212 [17]. Suppressor mutations of *rodZ* deletion that recover rod-like shape occur in  
213 *mreB* and *mrdA* (which encodes PBP2) [30]. Interestingly, most suppressors  
214 isolated in rich media die in minimal media, suggesting sensitivity to changes in a  
215 cellular quantity such as cell shape connected with growth rate [30]. Ribosomal  
216 profiling data indicated that there is approximately five-fold more MreB than RodZ  
217 in rich media, and that the ratio of MreB to RodZ abundance decreases in  
218 minimal media [31]. Similarly, mass spectrometry data from a variety of nutrient

219 conditions showed that the ratio of MreB to RodZ generally decreases in nutrient-  
220 limited conditions [32]. Our mass spectrometry measurements of the strain used  
221 for our curvature enrichment measurements (Fig. 1) were consistent with these  
222 previous studies, and indicated that the MreB:RodZ ratio was ~30% higher in  
223 exponential phase than in stationary phase (Fig. 2a, Methods). Thus, we  
224 hypothesized that the MreB localization changes along the growth curve were  
225 driven by changes in RodZ expression relative to that of MreB.

226

227 To test how RodZ expression changes the curvature sensing of MreB and cell  
228 shape, we constructed a strain in which *rodZ* is deleted from the chromosome,  
229 and the native promoter of *rodZ* was replaced by  $P_{ara}$  (Methods). The strain  
230 background has a chromosomally integrated sandwich fusion of MreB to msfGFP  
231 as the sole copy of *mreB* [11]; the chromosomally integrated msfGFP fusion  
232 provides the best complementation of cell size of all MreB fusions studied to date  
233 [15]. As expected, after 12 h of growth in the absence of arabinose, cells were  
234 round (Fig. 2b), similar to  $\Delta rodZ$  cells [17], whereas cells grown in the presence  
235 of arabinose were rod-shaped (Fig. 2b), albeit with larger cell widths than wild-  
236 type cells (Table S2).

237

238 To determine whether induction of RodZ changes MreB curvature sensing, we  
239 added various concentrations of arabinose (0 to 0.2%) directly to the 12-h culture  
240 of cells depleted of RodZ (0% arabinose), and imaged cells after 60 min (Fig. 2c).  
241 Since cells had already depleted the nutrients, little to no increase in optical

242 density took place during the 60 min of arabinose treatment (Fig. S4a). For all  
243 cultures, there was enough cell-shape variability to measure mean curvature  
244 enrichment profiles of MreB fluorescence. The culture grown without arabinose  
245 had a relatively flat enrichment profile, signifying approximately random  
246 localization. As the arabinose concentration was increased, we measured  
247 increased enrichment of MreB to lower mean curvature and depletion at high  
248 curvature (Fig. 2d). Importantly, the increased range of enrichment with  
249 arabinose induction (-25% to 25%) was in reasonable quantitative agreement  
250 with the profiles we measured during wild-type outgrowth from stationary phase  
251 (Fig. 1h). Moreover, overnight cultures grown in the absence of arabinose and  
252 then back-diluted 1:10,000 in fresh LB with varying levels of arabinose exhibited  
253 a dose-dependent average width after 4 h, with higher arabinose concentrations  
254 leading to wildtype-like widths (Fig. 2e). By contrast, cells grown in xylose rather  
255 than arabinose exhibited MreB curvature enrichment similar to the original  
256 overnight culture (0% arabinose) (Fig. 2d). In addition, cells grown with xylose  
257 exhibited more diffuse MreB fluorescence than cells grown with arabinose, as  
258 measured by the difference in the distribution of peripheral fluorescence values  
259 across the population (Fig. S4b). These results show that RodZ expression alters  
260 MreB localization in a dose-dependent manner, driving enhanced curvature  
261 sensitivity, which further regulates cell shape.

262

263 **MreB mutants that suppress  $\Delta rodZ$  growth defects have altered cell shape**  
264 **and curvature sensing**

265 A previous study identified several mutations in MreB that were selected as  
266 suppressors of the slow-growth phenotype of  $\Delta rodZ$  cells [30]. All of these  
267 mutants were able to grow as rods in the absence of *rodZ* [30]. We were  
268 interested to determine whether these mutations also modify the curvature  
269 sensing of MreB. We introduced three of these MreB mutations (D83E, R124C,  
270 and A174T) into *E. coli* MG1655 cells expressing the msfGFP sandwich fusion to  
271 MreB as the sole copy at the native *mreB* locus (Methods). These three  
272 mutations were selected to cover multiple regions of MreB; A174 is near the  
273 RodZ binding interface in domain IIA, R124C is near the membrane binding  
274 interface in subdomain IA, and D83E is at the double-protofilament interface in  
275 subdomain IB [33] (Fig. 3a). We also investigated a fusion of MreB<sup>E276D</sup> to  
276 msfGFP, since E276 is located at the polymer interface and near the RodZ  
277 binding interface (Fig. 3a).

278

279 MreB<sup>D83E</sup> and MreB<sup>R124C</sup> cells had a small, but significant, decrease in maximal  
280 growth rate compared to wild-type cells, while the maximal growth rate of  
281 MreB<sup>A174T</sup> cells was almost two-fold lower than MreB<sup>WT</sup> cells (Fig. S5a,b). These  
282 three strains also had significantly longer lag times than wild-type cells (Fig. S5c).  
283 We measured the cellular dimensions of each strain at the time of reaching  
284 maximal growth rate (Fig. 3b, c). MreB<sup>D83E</sup> and MreB<sup>A174T</sup> cells were somewhat  
285 and much wider and shorter than MreB<sup>WT</sup> cells, respectively (Fig. 3b,c), while  
286 MreB<sup>124C</sup> cells had a average width and length similar to wild-type cells (Fig. 3c)  
287 but exhibited substantial tapering and occasional branching (Fig. 3b). MreB<sup>E276D</sup>

288 cells had quantitatively similar growth (Fig. S5a) and shape (Fig. 3b,c)  
289 phenotypes to those of wild-type cells. These shape phenotypes are in good  
290 agreement with the study in which they were originally identified [30].  
291  
292 We next quantified the localization of MreB fluorescence as a function of  
293 curvature at the time when each strain reached its maximum growth rate. Since  
294 some of the strains exhibited more aberrant shapes than MreB<sup>WT</sup> (MreB<sup>R124C</sup> and  
295 MreB<sup>A174T</sup> in particular), we normalized the MreB enrichment (Fig. S6a) by the  
296 enrichment calculated from the fluorescence signal from the membrane dye  
297 FM4-64 (Fig. S6b), and observed qualitatively similar results without (Fig.  
298 3d,S6a) and with (Fig. S6c) normalization. MreB<sup>E276D</sup> cells had a curvature  
299 enrichment profile that was very similar to that of MreB<sup>WT</sup> (Fig. 3d). MreB<sup>D83E</sup> and  
300 MreB<sup>A174T</sup> cells had profiles shifted such that the crossover curvature at which  
301 localization was random (enrichment = 0) was lower for wider cells (Fig. 3d).  
302 MreB<sup>R124C</sup> cells had a flatter enrichment profile than any of the other strains,  
303 indicating less curvature sensitivity; this finding suggests that the branching that  
304 we observed in MreB<sup>R124C</sup> cells (Fig. 3b) is due to increased potential for growth  
305 at the polar (high curvature) regions during cell division, as has been observed in  
306 various cell-wall mutants [34]. Thus, while the three  $\Delta rodZ$  suppressor mutants  
307 drive rod-shaped growth in the absence of RodZ, they have non-wild-type  
308 growth, shape, and localization phenotypes.  
309

310 **Molecular dynamics (MD) simulations suggest that RodZ alters the**  
311 **intramolecular conformations and filament properties of MreB**

312 Since the cytoplasmic tail of RodZ directly binds MreB [7], we hypothesized that  
313 the altered curvature sensing of MreB due to RodZ expression is driven by a  
314 direct biophysical interaction that alters the conformation of MreB filaments. We  
315 previously used all-atom MD simulations to demonstrate that *Thermotoga*  
316 *maritima* MreB subunits adopt a range of conformations connected with filament  
317 properties [21], and predicted a polymerization-induced flattening of MreB  
318 subunits that was subsequently verified using X-ray crystallography [33]. The  
319 conformations of MreB filaments can be described by the intermolecular bending  
320 (out-of-plane  $\theta_1$ , in-plane  $\theta_2$ ) and twisting ( $\theta_3$ ) between two adjacent MreB  
321 subunits (Fig. 4a,b). To investigate whether RodZ binding alters the  
322 conformations of MreB filaments, we used the *T. maritima* MreB-RodZ co-crystal  
323 structure (PDB ID: 2WUS) to simulate MreB dimers with RodZ bound to both  
324 subunits (Methods, Fig. 4c). In the absence of RodZ, an ATP-bound MreB dimer  
325 exhibited significant bending along  $\theta_2$  compared to ADP-bound dimers (Fig. S7),  
326 as we previously reported [21], as well as some bending along  $\theta_1$  (Fig. 4d). In  
327 contrast, in the presence of RodZ, dimer bending was drastically reduced along  
328 both the  $\theta_1$  and  $\theta_2$  bending axes (Fig. 4d, S7). These results were consistent  
329 across replicate simulations (Fig. S7). Thus, since RodZ directly alters the  
330 spectrum of conformations adopted by MreB dimers *in silico*, we predict that the  
331 binding of RodZ to a fraction of the MreB subunits, which will be related at least

332 in part to the stoichiometry of MreB and RodZ (Fig. 2a), causes altered curvature  
333 sensing of MreB *in vivo*.

334

335 **Mutations in MreB also lead to straighter filaments, mimicking RodZ-bound**  
336 **MreB**

337 Since RodZ expression modulates MreB curvature enrichment, and since our  
338 simulations predicted that RodZ-binding alters MreB filament mechanics, we  
339 asked whether the  $\Delta rodZ$  suppressor mutants we studied *in vivo* also exhibit  
340 smaller bending angles than MreB<sup>WT</sup>, indicating straighter polymers. Since all  
341 three positions are conserved in *E. coli* and *T. maritima*, as is E276, we carried  
342 out all-atom MD simulations of dimers of the corresponding *T. maritima* mutants  
343 (D72E, R112C, A162T, E266D; Fig. 3a) bound to ATP, in the absence of RodZ.  
344 We observed shifts in the bending angles  $\theta_1$  and  $\theta_2$  toward zero (the approximate  
345 bending angle for MreB<sup>WT</sup> bound to RodZ; Fig. 4d, S7) for all mutants, with a high  
346 degree of reproducibility in replicate simulations (Fig. S7). The  
347 MreB<sup>A162T</sup>(MreB<sup>A174T</sup>) mutant, which had a shape phenotype (Fig. 3b) closer to  
348 that of spherical RodZ- cells (Fig. 2b), displayed only a small degree of  
349 straightening, while the MreB<sup>D72E</sup>(MreB<sup>D83E</sup>), MreB<sup>R112C</sup>(MreB<sup>R124C</sup>), and  
350 MreB<sup>E266D</sup>(MreB<sup>E276D</sup>) dimers showed intermediate straightening. These data  
351 further support the hypothesis that MreB filament mechanics is an important  
352 component of cell-shape regulation.

353



354 **A combination of MreB<sup>WT</sup> and MreB<sup>E276D</sup> recovers rod-like shape in the**  
355 **absence of RodZ**

356 In our MD simulations, MreB<sup>E266D</sup>(MreB<sup>E276D</sup>) dimers displayed intermediate  
357 straightening (Fig. S7), suggesting that the mechanical properties of polymers of  
358 this mutant are different from those of MreB<sup>WT</sup> despite having similar growth and  
359 shape phenotypes to wildtype in the presence of RodZ (Fig. 3b-d, S5). Thus, we  
360 wondered whether MreB<sup>E276D</sup> cells would be rod-shaped in the absence of RodZ.  
361 We constructed a  $\Delta rodZ$  strain with MreB<sup>E276D</sup> fused to sfGFP [15]. Like MreB<sup>WT</sup>  
362 cells, MreB<sup>E276D</sup> cells were round in the absence of RodZ (Fig. S5d) and grew as  
363 slowly as  $\Delta rodZ$  MreB<sup>WT</sup> cells, indicating that MreB<sup>E276D</sup> is not a suppressor of  
364  $\Delta rodZ$  growth defects. Thus, we hypothesized that the mutant imitates a scenario  
365 in which MreB constitutively binds RodZ, similar to overexpression of RodZ,  
366 which is known to disrupt rod-like shape and result in round cells [17].

367

368 To test this hypothesis, we sought to create a genetic background in which only a  
369 fraction of MreB is bound to RodZ. We constructed a strain expressing MreB<sup>WT</sup>  
370 from the chromosome and MreB<sup>E276D</sup>-msfGFP from a plasmid with the otherwise  
371 wild-type *mre* operon driven by the native *mreB* promoter (Methods) in a  $\Delta rodZ$   
372 background; we will refer to this strain as  $\Delta rodZ$  MreB<sup>WT</sup>+MreB<sup>E276D</sup>\* (the asterisk  
373 indicates the presence of msfGFP), and use similar notation for strains with other  
374 *mreB* alleles on the chromosome and fused to sfGFP on the plasmid, with the  
375 rest of the *mre* operon included on the plasmid in all such strains. The  $\Delta rodZ$   
376 MreB<sup>WT</sup>+MreB<sup>E276D</sup>\* strain formed larger colonies and grew more quickly than

377  $\Delta rodZ$  MreB<sup>WT</sup> cells (Fig. S5).  $\Delta rodZ$  MreB<sup>WT</sup>+MreB<sup>E276D\*</sup> cells were rod-shaped  
378 (Fig. 5a), albeit wider than MreB<sup>WT</sup> cells (Fig. S8, Table S2), indicating that  
379 complementation was not perfect. To determine whether the MreB copy number  
380 is important for recovering of rod-shape, we constructed  $\Delta rodZ$  MreB<sup>WT</sup>+MreB<sup>WT\*</sup>  
381 and  $\Delta rodZ$  MreB<sup>E276D</sup>+MreB<sup>E276D\*</sup> strains.  $\Delta rodZ$  MreB<sup>WT</sup>+MreB<sup>WT\*</sup> cells were  
382 slow-growing spheres (Fig. 5b, S5a,b), unlike  $\Delta rodZ$  MreB<sup>WT</sup>+MreB<sup>E276D\*</sup> cells  
383 that displayed a contour curvature profile representative of rod-shaped cells (Fig.  
384 5b). After 90 min of growth, the  $\Delta rodZ$  MreB<sup>WT</sup>+MreB<sup>E276D\*</sup> strain exhibited a  
385 wider range of MreB enrichment than the  $\Delta rodZ$  MreB<sup>WT</sup>+MreB<sup>WT\*</sup> strain (Fig. 5c).  
386 While some  $\Delta rodZ$  MreB<sup>E276D</sup>+MreB<sup>E276D\*</sup> cells were rod-shaped (Table S2), this  
387 strain displayed significantly longer lag time (Fig. S5a,c) and lower growth rate  
388 (Fig. S5a,d) than  $\Delta rodZ$  MreB<sup>WT</sup>+MreB<sup>E276D\*</sup> or  $\Delta rodZ$  MreB<sup>WT</sup> cells (Fig.  
389 S5a,c,d).

390

391 To ascertain whether  $\Delta rodZ$  MreB<sup>WT</sup>+MreB<sup>E276D\*</sup> and  $\Delta rodZ$   
392 MreB<sup>E276D</sup>+MreB<sup>E276D\*</sup> cells were truly undergoing rod-like growth, we grew them  
393 in the presence of cephalixin, which inhibits the division-specific cell wall-  
394 synthesis enzyme PBP3 [35]. In the presence of cephalixin, round *E. coli* cells  
395 lyse due to the inability to divide [36], whereas rod-shaped *E. coli* cells elongate  
396 to tens of microns [11]. Many  $\Delta rodZ$  MreB<sup>WT</sup>+MreB<sup>E276D\*</sup> cells (80%) elongated by  
397 more than two-fold over 70 min without dramatically changing cell width, whereas  
398 only 50% of  $\Delta rodZ$  MreB<sup>E276D</sup>+MreB<sup>E276D\*</sup> cells were able to double in length as  
399 opposed to halting growth (Fig. 5d,  $n \geq 50$  cells). Taken together, these  $\Delta rodZ$

400 MreB<sup>WT</sup>+MreB<sup>E276D\*</sup> data demonstrate recovery of rod-like shape in the absence  
401 of RodZ; the enhanced recovery compared with  $\Delta rodZ$  MreB<sup>E276D</sup>+MreB<sup>E276D\*</sup>  
402 cells suggest the importance of the relative levels of RodZ-bound and unbound  
403 MreB in wild-type cells.

404

#### 405 **RodZ-related MreB mutant filaments are longer than MreB<sup>WT</sup> filaments**

406 How are the biophysical properties of MreB connected to the cellular-scale  
407 properties of filaments and intracellular patterning? Since our MD simulations  
408 predicted that RodZ binding and various MreB mutations alter curvature  
409 enrichment by changing filament bending, and moreover since some  
410 perturbations (A174T, E276D) occurred near the polymerization interface of the  
411 MreB filament structure, we wondered whether these changes manifested in part  
412 as increased MreB polymer length. MreB usually forms diffraction-limited puncta  
413 [9, 10]; thus, to measure the patterning of MreB, we carried out super-resolution  
414 imaging using structured illumination microscopy (Methods). Strikingly, some  
415 cells expressing MreB<sup>E276D</sup> alone contained filaments that were much longer than  
416 filaments in MreB<sup>WT</sup> cells, extending several microns in many cases (Fig. 5e). In  
417 contrast, MreB<sup>WT</sup> formed small structures, presumably consisting of short  
418 filaments, with sizes consistent with structures imaged using epifluorescence  
419 microscopy (Fig. 5e). MreB<sup>R124C</sup>, MreB<sup>D83E</sup>, and MreB<sup>A174T</sup> cells displayed  
420 fluorescence patch sizes (Methods) intermediate between those of MreB<sup>WT</sup> and  
421 MreB<sup>E276D</sup> cells (Fig. 5f), suggesting that all mutations stabilized filaments  
422 compared to MreB<sup>WT</sup>. Neither MreB<sup>E276D</sup> nor MreB<sup>WT</sup> structure sizes were

423 significantly smaller when *rodZ* was deleted (Fig. 5f), suggesting that RodZ does  
424 not alter MreB oligomerization. MreB<sup>WT</sup>+MreB<sup>E276D\*</sup> cells contained MreB  
425 structures of intermediate size (Fig. 5g), consistent with the hypothesis that  
426 MreB<sup>WT</sup> and MreB<sup>E276D</sup> subunits form hybrid filaments. Consistent with previous  
427 observations, cells that were more rod-like (Methods) had larger MreB structures  
428 than did less-rod-like cells (Fig. S10,  $p < 0.0001$  by the two-sample Kolmogorov-  
429 Smirnov test), suggesting that intermediate polymer size is required for the  
430 recovery of rod-shaped cells in the absence of RodZ.

431 **Discussion**

432 Here, we demonstrate that *E. coli* dynamically modulates the geometric sensing  
433 of MreB via RodZ to drive changes in cell shape. Increased RodZ expression  
434 systematically enhanced the enrichment of MreB in regions of negative contour  
435 curvature (Fig. 2d), suggesting that RodZ alters the biophysical properties of  
436 MreB filaments, and decreased cell width (Fig. 2e), indicating that the changes in  
437 MreB localization affect cell morphology. Our MD simulations predicted that the  
438 bending of ATP-bound MreB filaments is reduced by RodZ binding (Fig. 4d),  
439 which could stabilize filaments on the relatively flat membrane. Nonetheless, it is  
440 also likely that filament mechanics is intrinsically coupled to biochemical  
441 parameters such as hydrolysis state [21], which in turn affect polymer size.  
442 Although structured illumination microscopy suggested that the formation of  
443 larger MreB oligomers with RodZ than without RodZ is necessary for rod-shaped  
444 growth (Fig. 5f), the observation that MreB<sup>E276D</sup> did not rescue rod-like shape in  
445  $\Delta rodZ$  cells (Fig. S5d) may be due to the inability of very long filaments (Fig. 5g)  
446 to adjust to local variations in cell shape. By contrast, the combination of MreB<sup>WT</sup>  
447 and MreB<sup>E276D</sup> was sufficient to recover rod-shaped growth in the absence of  
448 RodZ (Fig. 5a-d), implying the need for balance between the polymeric properties  
449 of RodZ-bound and unbound MreB<sup>WT</sup> filaments. The three  $\Delta rodZ$  suppressor  
450 MreB mutants that we studied have different curvature enrichment profiles (Fig.  
451 3d) and larger polymer patch sizes (Fig. 5f) than wild-type cells *in vivo*, and while  
452 these changes enable growth in the absence of  $\Delta rodZ$ , potentially due to the  
453 capacity of these mutant filaments to mimic the effects of RodZ binding on MreB

454 polymer mechanics (Fig. 4d), all three mutants have a fitness cost and altered  
455 shape relative to MreB<sup>WT</sup> that we suggest results from the inability to properly  
456 modulate MreB filament length and mechanics in a wild-type manner. A previous  
457 study reported that the only  $\Delta rodZ$  suppressor MreB mutant that had higher self-  
458 interaction than MreB<sup>WT</sup> was also the only mutant that rescued rod-like shape in  
459 minimal medium [30], possibly due to the need for longer MreB filaments in  
460 minimal medium, further highlighting the links between regulation of MreB  
461 polymerization and shape determination. Inducible RodZ expression and MreB  
462 mutations should prove powerful and complementary tuning knobs for further  
463 dissection of the variables dictating MreB localization and cell-shape  
464 determination.

465

466 Much remains to be discovered regarding the links between MreB, its binding  
467 partners, and cell-wall insertion. A previous study showed that RodZ is required  
468 for processive motion of MreB [36], while our previous simulations suggested that  
469 curvature-mediated patterning could be responsible for processive motion along  
470 the circumferential deformations of negative Gaussian curvature induced by cell-  
471 wall insertion [11]. Given that RodZ also affects MreB curvature enrichment, the  
472 two bases for processivity are not necessarily contradictory. Moreover, while  
473 MreB depolymerization by A22 alters the pattern of cell-wall insertion, suggesting  
474 that MreB patterning dictates cell shape, it may also be the case that other  
475 aspects of cell size changes affect MreB dynamics and localization. In organisms  
476 such as *Bacillus subtilis* that have multiple MreB homologs, it is possible that

477 RodZ differentially modulates the curvature enrichment of each homolog. MreB  
478 has been shown to colocalize with MreC/D [16] and FtsZ in *E. coli* [37]; in the  
479 latter case, FtsZ adopts various filament conformations [38, 39], which could  
480 couple mechanically to MreB. Thus, MreB may have as diverse a set of partners  
481 as the actin-binding proteins that enable myriad functions [40]. Given that some  
482 actin-binding proteins can deform membranes [41], other bacterial proteins may  
483 act similarly to RodZ to specifically modulate MreB's curvature preference.

484

485 The rapid changes in cell shape during the progression from stationary phase to  
486 exponential growth and back (Fig. 1b) are consistent with the classic Growth Law  
487 of a positive relationship between nutrient-determined steady-state growth rate  
488 and cell size [23], as well as with a more recent finding linking relative rates of  
489 surface and volume synthesis to cell-size determination [42]. Our discovery that  
490 the curvature preference of MreB (Fig. 1h) varies continuously with growth rate  
491 (Fig. 1a), cell size (Fig. 1b), and the ratio of MreB to RodZ (Fig. 2d) suggests that  
492 RodZ-driven MreB localization may be a major component of the regulation of  
493 cell size; MreB enrichment profiles and cellular dimensions both changed  
494 gradually over the first 3 h of passaging (Fig. 1b,h), and the variability in  
495 enrichment profiles across time points was similar to what we achieved by  
496 modulating RodZ levels (Fig. 2d). Our data indicate that for a fixed contour  
497 curvature, MreB prefers wider regions of the cell (Fig. 1f), which may provide a  
498 homeostasis mechanism for cell width. The rapid dynamics in mean width and  
499 length over 1-2 h (Fig. 1b) indicate that both dimensions can be tuned over a few

500 generations in either direction. This rapid size variation should be useful for  
501 probing many general physiological questions such as the coupling between  
502 DNA replication and cell division [43]. The remarkable ability of bacterial cells to  
503 adjust their size, and hence their physiology, with different concentrations of the  
504 same molecular components highlights their ability to regulate and exploit the  
505 biophysics of their cytoskeletons.



506 **Author Contributions**

507 A.C. and K.C.H. conceptualized the study. A.C., H.S., and K.C.H. designed the  
508 experiments. A.C. and H.S. performed cloning and single-cell imaging. A.C.  
509 performed molecular dynamics simulations. A.C., H.S., and K.C.H. analyzed  
510 data. A.C., H.S., and K.C.H. wrote the manuscript. All authors reviewed the  
511 manuscript before submission.

512

513 **Acknowledgments**

514

515 The authors thank the Huang lab for helpful discussions, Piet de Boer, Felipe  
516 Bendezu, Nickolay Ouzounov, Joshua Shaevitz, and Zemer Gitai for strains, and  
517 the Stanford University Mass Spectrometry facility for assistance. This work was  
518 supported in part by a Stanford Graduate Fellowship and a Gerald J. Lieberman  
519 Fellowship (to A.C.), an Agilent Graduate Fellowship and a Stanford  
520 Interdisciplinary Graduate Fellowship (to H.S.), and NSF CAREER Award MCB-  
521 1149328, NIH Director's New Innovator Award DP2-OD006466, the Allen  
522 Discovery Center at Stanford University on Systems Modeling of Infection, and  
523 the Stanford Center for Systems Biology under NIH grant P50-GM107615 (to  
524 K.C.H.). Structured illumination microscopy in this study was supported, in part,  
525 by Award Number 1S10OD01227601 from the National Center for Research  
526 Resources. The contents of this study are solely the responsibility of the authors  
527 and do not necessarily represent the official views of the National Center for  
528 Research Resources or the National Institutes of Health.

529 **Methods**

530

531 **Strains and growth conditions**

532 All *E. coli* strains and plasmids used in this study, along with the condition-  
533 dependent mean cell length and width of all imaging experiments, are described  
534 in Table S2. Strain construction was performed using standard transformation or  
535 transduction methods. Lysogeny broth (LB) with 5 g/L NaCl was used for all  
536 experiments. Strains were grown at 37 °C. The antibiotics chloramphenicol  
537 (Sigma-Aldrich) and cephalixin (MP Biomedicals) were used at concentrations of  
538 15 µg/mL and 10 µg/mL, respectively. For *rodZ* induction experiments, xylose or  
539 arabinose were supplemented as described in the main text.

540

541  $\Delta rodZ$  suppressor MreB mutants were generated using  $\lambda$ -Red recombination in  
542 the parental strain expressing a sandwich fusion of MreB to msfGFP (NO34)  
543 following standard protocols [44]. The resulting colonies were confirmed by  
544 colony PCR and sequencing. Mutated MreB-msfGFP alleles were moved to a  
545 clean MG1655 background using P1 transduction.

546

547 To measure growth curves, cells were cultured in LB to stationary phase for 18 h  
548 or 24 h, then back diluted 200-fold into LB. Optical density was measured using  
549 an M200 plate reader (Tecan Group).

550

551 **Morphological time course**

552 To monitor cell shape as a function of population density, we back-diluted a 24-h  
553 culture grown in LB 1:200 into fresh LB in a test tube. Every 15 min, we extracted  
554 a small sample and imaged cells on an agarose pad. To minimize temperature  
555 fluctuations of the growing culture, cultures were immediately returned to the  
556 incubator after the brief period of sample extraction. Cells were imaged with  
557 phase-contrast and epifluorescence microscopy to measure cell shape and MreB  
558 localization.

559

### 560 **Microscopy**

561 Cells were imaged on a Nikon Eclipse Ti-E inverted fluorescence microscope  
562 with a 100X (NA 1.40) oil-immersion objective (Nikon Instruments Inc., Melville,  
563 NY, USA). Images were collected using an Andor DU885 EMCCD or Neo 5.5  
564 sCMOS camera (Andor Technology, South Windsor, CT, USA). Cells were  
565 maintained at 37 °C during imaging with an active-control environmental  
566 chamber (HaisonTech, Taipei, Taiwan). Images were collected using  $\mu$ Manager  
567 v. 1.4 [45].

568

### 569 **Image analysis**

570 The MATLAB (MathWorks, Natick, MA, USA) image processing software  
571 *Morphometrics* [29] was used to segment cells and to identify cell contours from  
572 phase-contrast images. Fluorescence intensity profiles were generated by  
573 integrating image fluorescence along lines perpendicular to the contour at points  
574 uniformly spaced by approximately one pixel, extending five pixels in either

575 direction. Mid-plane contour curvature was a three-point measurement defined  
576 by the arc-length derivative of the vector field formed from the unit normals to the  
577 contour, and did not assume any correlation of curvature values on opposite  
578 sides of the neutral axis of the cell [11]. Each curvature profile was smoothed  
579 with a low-pass Gaussian filter. Cells were categorized as rod-like or non-rod-like  
580 based on the success or failure of the *Morphometrics* meshing function, which  
581 determines whether a grid of lines perpendicular to a midline can be used as a  
582 coordinate system for the polygon defined by the cell contour.

583

#### 584 **Equilibrium MD simulations**

585 All simulations were performed as in Ref. [21] using the package NAMD [46]  
586 with the CHARMM27 force field [47, 48]. Water molecules were described with  
587 the TIP3P model [49]. Long-range electrostatic forces were evaluated with the  
588 particle-mesh Ewald summation approach with a grid spacing of  $<1 \text{ \AA}$ . An  
589 integration time step of 2 fs was used [50]. Bonded terms and short-range, non-  
590 bonded terms were evaluated at every time step, and long-range electrostatics  
591 were evaluated at every other time step. Constant temperature ( $T = 310 \text{ K}$ ) was  
592 maintained using Langevin dynamics, with a damping coefficient of  $1.0 \text{ ps}^{-1}$ . A  
593 constant pressure of 1 atm was enforced using the Langevin piston algorithm  
594 [51] with a decay period of 200 fs and a time constant of 50 fs.

595

#### 596 **Simulated systems**

597 Twelve MD systems were analyzed (Table S3), eight of which were simulated in  
598 this study. For all simulations without RodZ, the MreB crystal structure of *T.*  
599 *maritima* MreB bound to AMP-PNP (PDB ID: 1JCG) [52] was used, with the  
600 nucleotide modified to ATP or ADP [21]. For simulations including RodZ, the  
601 cytoplasmic tail of RodZ was added to each MreB by aligning the simulated  
602 dimer with the co-crystal structure of MreB and RodZ (PDB ID: 2WUS). Water  
603 and neutralizing ions were added around each MreB dimer, resulting in final  
604 simulation sizes of 95,000-143,000 atoms. All unconstrained simulations were  
605 performed for at least 50 ns. Setup, analysis, and rendering of the simulation  
606 systems were performed with VMD [53]. To compute average values and  
607 distributions of measurements, only the last 30 ns of each simulation trajectory  
608 were used. To ensure that the simulations had reached equilibrium,  
609 measurement distributions were fit to a Gaussian distribution. A satisfactory fit  
610 implies that the system is located within an energy minimum well approximated  
611 by a harmonic potential. All simulations were repeated at least twice, and repeat  
612 simulations gave similar results (Fig. S7). Relative bending orientations of dimer  
613 subunits were calculated by determining the rotational transformation required to  
614 align the subunits [21].

615

### 616 **Sample preparation and imaging for structured illumination microscopy**

617 Overnight, saturated cultures were back-diluted 1:100 into fresh LB and grown at  
618 37 °C with shaking until OD~0.1. One milliliter of the cells was fixed in  
619 phosphate-buffered saline containing 3% glutaraldehyde/3% paraformaldehyde

620 (Electron Microscopy Sciences) at room temperature for 15 min, with 1  $\mu\text{g}/\text{mL}$   
621 FM4-64FX membrane stain (Invitrogen) added during fixation. Cells were  
622 washed three times in cold phosphate-buffered saline, and 1  $\mu\text{L}$  of the cell  
623 solution was pipetted onto a No. 1.5 coverslip (Zeiss) coated with poly-L-lysine  
624 solution (Sigma-Aldrich). After the droplet dried, a small drop of ProLong  
625 Diamond AntiFade Mountant (Thermo Fisher) was added on top of the droplet,  
626 and the coverslip was mounted on a glass slide (VWR) and sealed with VALAP  
627 (equal parts Vaseline, lanolin, and paraffin by weight).

628

629 Cell samples were imaged on an OMX V4 microscope platform (GE Life  
630 Sciences) with a 100X (NA 1.42) oil-immersion objective (Nikon Instruments).  
631 Images from two channels were collected on two Evolve 512 electron-multiplying  
632 charged couple device cameras (Photometrics) using DeltaVision microscopy  
633 imaging system v. 3.70 (GE Life Sciences). The two-sample Kolmogorov-  
634 Smirnov test tests the null hypothesis that two one-dimensional samples are  
635 drawn from the same underlying probability distribution.

636

### 637 **Image analysis for structured illumination microscopy**

638 Raw images were reconstructed and aligned using SoftWoRx v6.5.2 (GE Life  
639 Sciences), and maximum projection images were created using FIJI [54].  
640 Individual cells were segmented by the FM4-64FX signal using *Morphometrics*.  
641 MreB patches within each cell contour were identified from the GFP channel

642 based on intensity, and patches smaller than the diffraction limit for structured  
643 illumination microscopy ( $\sim 0.03 \mu\text{m}^2$ ) were excluded from further quantification.

644

645 **Code/data availability**

646 The datasets generated and/or analyzed during the current study and analysis  
647 software are available from the corresponding author on reasonable request.

648 **Figure Legends**

649

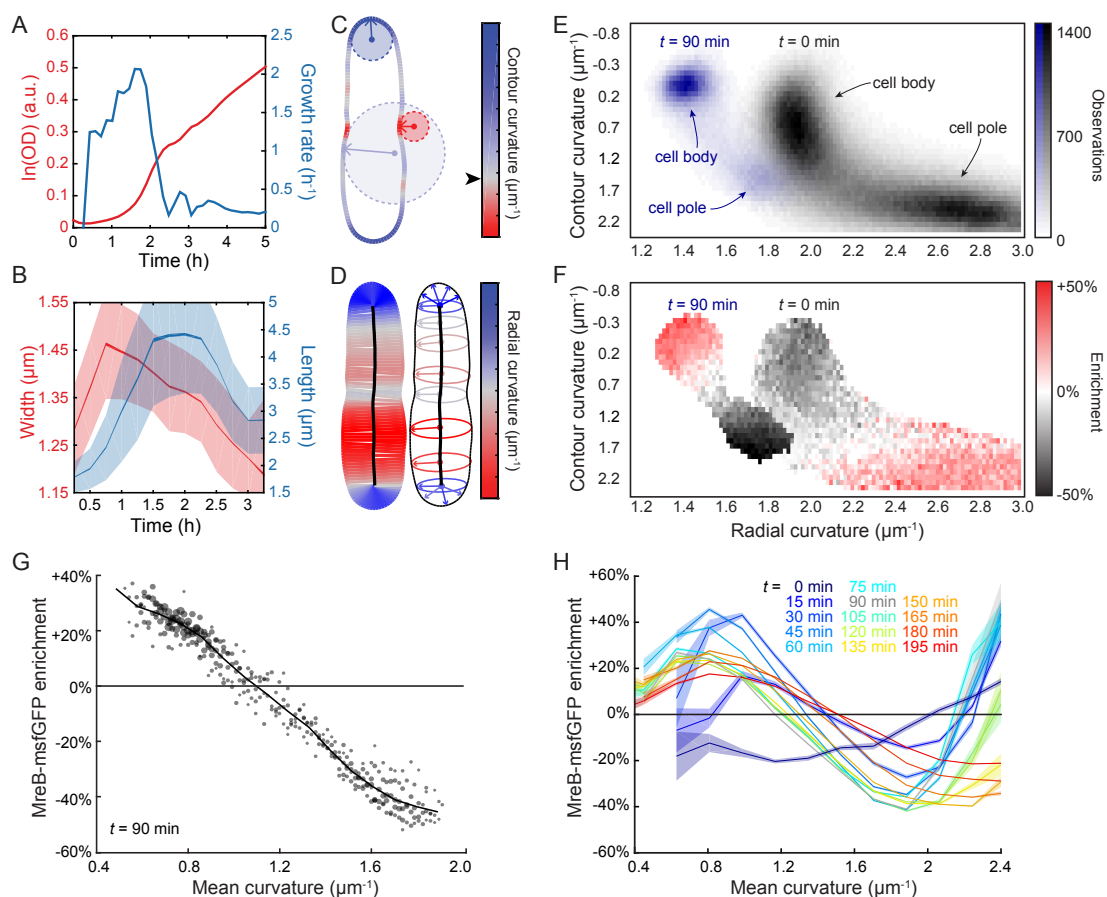

650

651 **Figure 1: Cell shape and MreB localization patterns change as cell density**  
652 **increases in a growing culture.**

- 653 a) The population density and growth rate of *E. coli* cells growing in fresh LB  
654 were estimated from optical density (OD) measurements.
- 655 b) Mean cell width and length across the population varied rapidly and  
656 asynchronously during the time course. Shaded areas represent standard  
657 deviation at each time point, whereas the variable thickness of the solid  
658 line represents the standard error at each time point ( $n > 800$  cells).



659 c-d) The local geometry of every point on each cell's contour was  
660 characterized by the in-plane contour curvature (c) and perpendicular  
661 radial curvature (d). In (c), the red circle represents a point of negative  
662 contour curvature at the division site, the small blue circle represents a  
663 point of highly positive contour curvature at the poles, and the large blue  
664 circle represents a region of slightly positive contour curvature along the  
665 lateral wall. Black arrowhead next to colormap in (c) demarcates zero  
666 contour curvature, corresponding to flat regions. In (d), the radial curvature  
667 is inversely related to the local width of the cell.

668 e) The frequency of pairs of contour and radial curvature values sampled by  
669 a population of *E. coli* cells after 0 min and 90 min of growth illustrates the  
670 range of curvature values across their surfaces. Each bin is  $0.0821 \text{ } \mu\text{m}^{-1}$   
671 (contour curvature) by  $0.0165 \text{ } \mu\text{m}^{-1}$  (radial curvature). Black:  $t = 0$ , blue:  $t =$   
672 90 min.

673 f) Enrichment of MreB fluorescence at  $t = 90$  min observed for each bin in  
674 (e) with more than 50 observations demonstrates that MreB localization  
675 depends on both contour curvature and radial curvature.

676 g) Each circle represents the MreB-msfGFP enrichment for the estimated  
677 mean curvature of a bin in (f) (corresponding to data from  $t = 90$  min),  
678 which was defined as the average of contour and radial curvatures for that  
679 bin. The radius of each circle is linear with the log number of observations  
680 for the respective bin in (e). The weighted average across bins with a  
681 given mean curvature is shown as a solid line.

682 h) The enrichment of MreB-msfGFP varied substantially across the growth  
683 curve. Shaded areas represent the standard deviation of enrichment from  
684 resampled data at each time point (Methods). All bins include at least 50  
685 observations.  
686

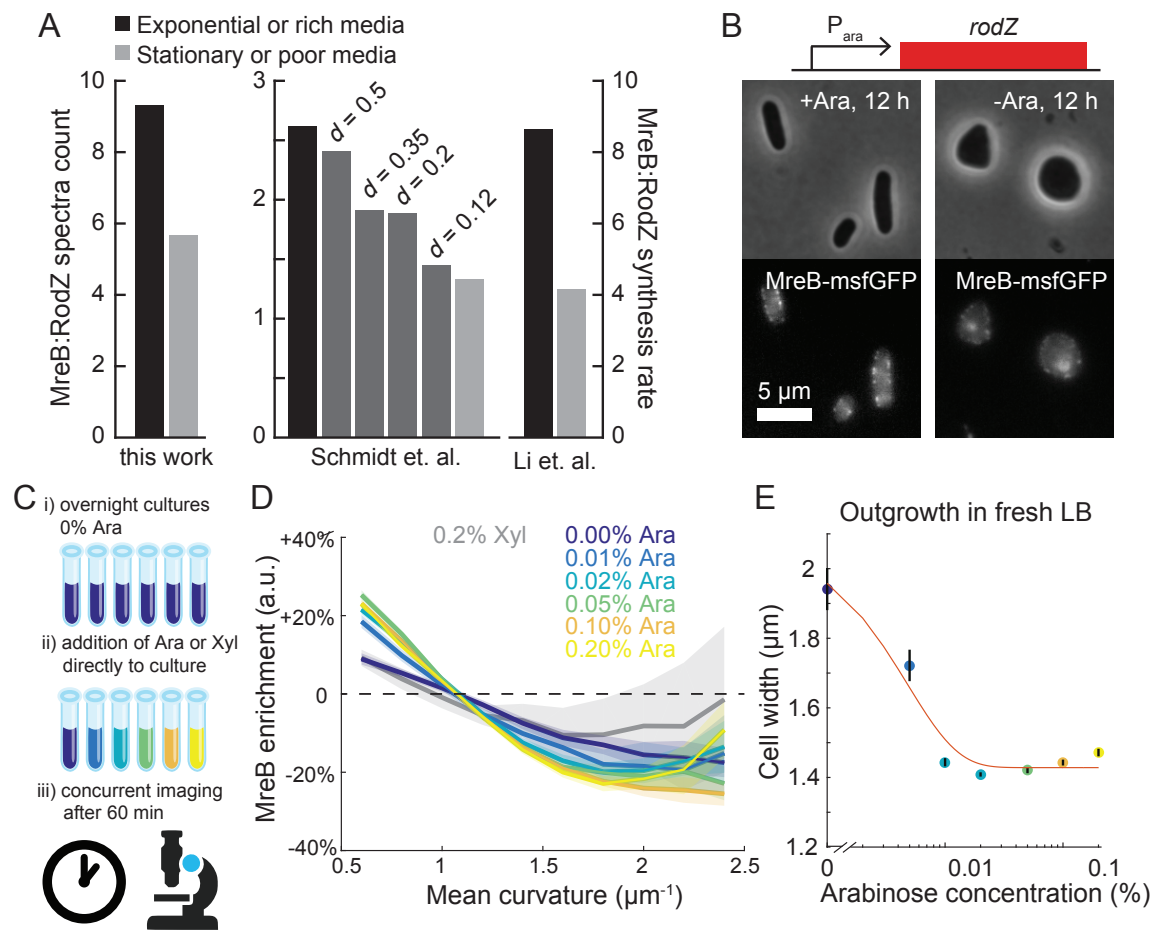

687

688 **Figure 2: RodZ expression drives changes in MreB curvature enrichment**  
 689 **profile.**

- 690 a) The ratio of MreB to RodZ protein abundance consistently increases in a  
 691 manner concordant with growth rate across multiple independent studies.  
 692 *d*: chemostat dilution rate.
- 693 b) For a strain in which the native promoter of *rodZ* was replaced by  $P_{ara}$ ,  
 694 RodZ expression is driven by arabinose (Ara). In the absence of  
 695 arabinose, cells became spheroidal.
- 696 c) Schematic of experimental approach in (d). Overnight cultures grown in  
 697 the absence of arabinose were further incubated after adding varying

698 amounts of arabinose. The distribution of MreB fluorescence was

699 measured after 60 min.

700 d) After 1 h of growth, induction of RodZ by arabinose enhanced the

701 depletion of MreB at high contour curvature in a dose-dependent manner.

702 By contrast, the enrichment profile was more uniform after induction with

703 0.2% xylose or 0% arabinose. Shaded areas represent the standard

704 deviation of enrichment from resampled data at each condition. All bins

705 include at least 50 observations.

706 e) Overnight cultures grown in 0% arabinose and back-diluted 1:10,000 into

707 fresh LB with varying levels of arabinose exhibited dose-dependent steady

708 state widths after 4 h of growth. Black lines represent standard error of the

709 mean ( $n > 50$  cells).

710

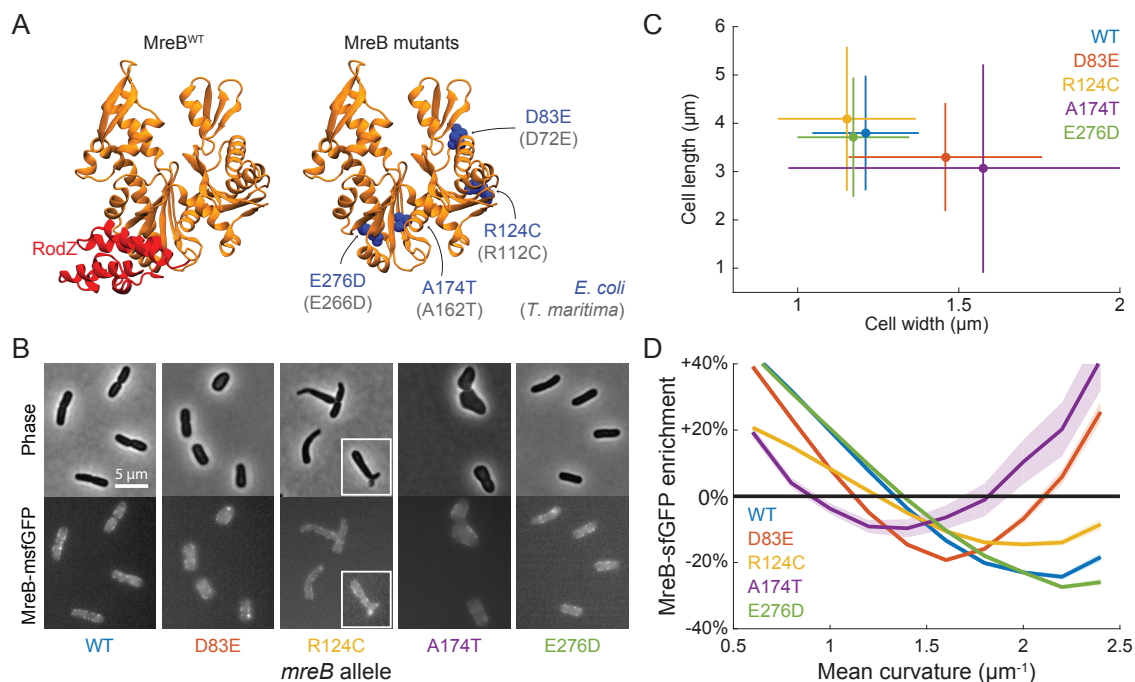

711

712 **Figure 3: Genetic perturbations that alter the MreB curvature enrichment**  
713 **profile.**

714 a) RodZ binds near the polymerization interface in domain IIA of MreB (left).

715 Mutations in MreB previously identified [30] to suppress  $\Delta rodZ$  growth  
716 defects (D83E, R124C, and A174T), as well as a mutation at the  
717 polymerization interface (E276D), are spread throughout the protein and  
718 are conserved in *T. maritima* (gray text in parentheses; right).

719 b) MreB mutants (all as sandwich fusions to msfGFP) have a variety of cell  
720 shapes, including wider cells (MreB<sup>D83E</sup>), tapered and sometimes  
721 branched cells (MreB<sup>R124C</sup>; white box highlights a branched cell), much  
722 wider and rounder cells (MreB<sup>A174T</sup>), and wild-type-like cells (MreB<sup>E276D</sup>).  
723 Error bars represent  $\pm 1$  standard deviation ( $n > 230$  cells).

724 c, d) Strains that harbor mutations in MreB that suppress  $\Delta rodZ$  growth  
725 defects have altered cellular dimensions (c) and MreB curvature

726 enrichment profiles (d) relative to wildtype, whereas MreB<sup>E276D</sup> cells are  
727 similar to wildtype. Error bars in (c) represent standard deviation of  
728 population. All bins in (d) include at least 50 observations.  
729

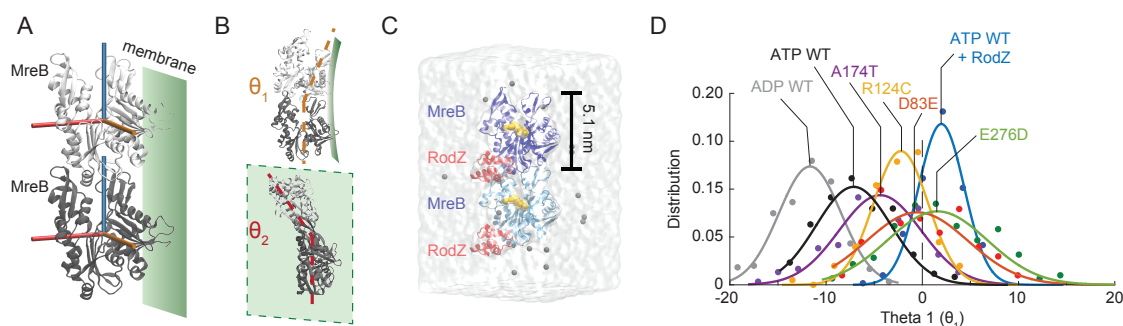

730

731 **Figure 4: RodZ binding and MreB mutations may alter the bending**  
732 **properties of MreB filaments.**

- 733 a) Schematic of an MreB dimer (PDB ID: 1JCG) and its orientation relative to  
734 the membrane. The bending of MreB protofilaments is captured by the  
735 relative orientation along three orthogonal axes (cylinders) of adjacent  
736 MreB subunits, colored light (top) and dark gray (bottom). The membrane  
737 binding interface of the MreB protofilament is shown as a green plane.
- 738 b) Schematic of MreB dimer bending angles out of the plane of the  
739 membrane ( $\theta_1$ , top) and in the plane of the membrane ( $\theta_2$ , bottom). In the  
740 crystal structures that form the initial states of our MD simulations, these  
741 bending angles are zero.
- 742 c) MD simulation system comprised of a nucleotide-bound *T. maritima* MreB  
743 dimer, with each subunit bound to the cytoplasmic tail of RodZ.
- 744 d) D72E, R112C, A162T, and E266D mutations in ATP-bound *T. maritima*  
745 MreB shift the  $\theta_1$  bending angles toward that of a RodZ-bound ATP dimer,  
746 signifying filament straightening.

747

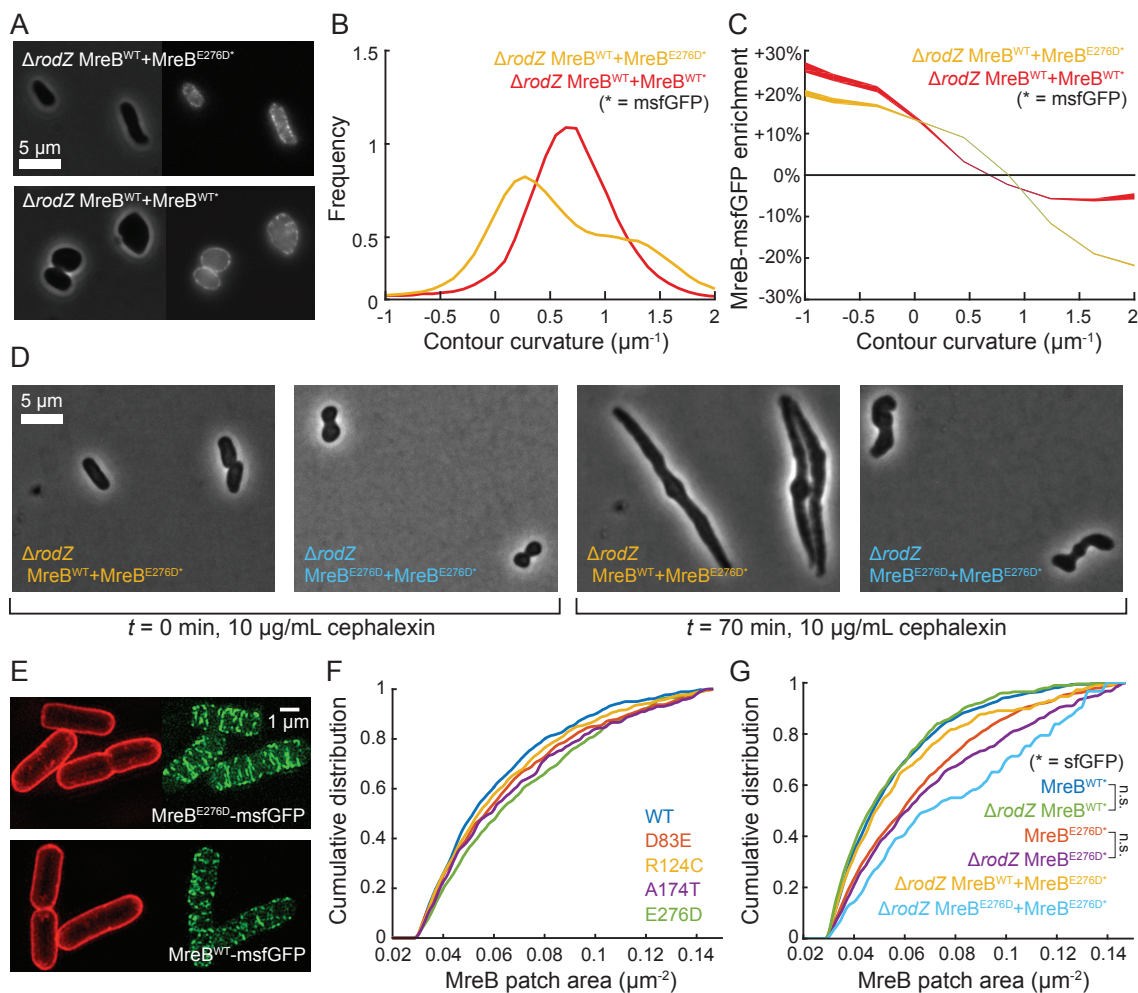

748

749 **Figure 5: Concurrent expression of MreB<sup>E276D</sup>-msfGFP and MreB<sup>WT</sup> recovers**  
 750 **rod shape in  $\Delta rodZ$  cells.**

- 751 a) Rod shape was rescued in  $\Delta rodZ$  cells with chromosomal expression of  
 752 MreB<sup>WT</sup> by introducing a plasmid-borne copy of MreB<sup>E276D</sup>-msfGFP (top),  
 753 but not with a plasmid-borne copy of MreB<sup>WT</sup>-msfGFP (bottom).
- 754 b)  $\Delta rodZ$  MreB<sup>WT</sup>+MreB<sup>E276D</sup>\* cells exhibited a bimodal contour curvature  
 755 distribution with one peak centered near zero, characteristic of rod-shaped  
 756 cells, unlike the unimodal distribution of  $\Delta rodZ$  MreB<sup>WT</sup>+MreB<sup>WT</sup>\* cells.



- 757 c)  $\Delta rodZ$  MreB<sup>WT</sup>+MreB<sup>E276D\*</sup> cells exhibited enhanced depletion of  
758 MreB<sup>E276D</sup>-msfGFP at high contour curvature as compared with MreB<sup>WT</sup>-  
759 msfGFP in  $\Delta rodZ$  MreB<sup>WT</sup>+MreB<sup>WT\*</sup> cells.
- 760 d)  $\Delta rodZ$  MreB<sup>WT</sup>+MreB<sup>E276D\*</sup> cells maintained a rod-like shape even when  
761 division was inhibited by cephalixin (10  $\mu$ g/mL), while  $\Delta rodZ$   
762 MreB<sup>E276D</sup>+MreB<sup>E276D\*</sup> cells often failed to elongate by two-fold in 70 min  
763 (50% vs. 80%  $\Delta rodZ$  MreB<sup>WT</sup>+MreB<sup>E276D\*</sup> cells) and lost the ability to  
764 regulate cell width. Snapshots of cells shown before (left) and after (right)  
765 70 min of cephalixin treatment.
- 766 e) Structural illumination microscopy revealed that the MreB<sup>E276D</sup>-msfGFP  
767 mutant strain had qualitatively longer filaments than the strain harboring  
768 MreB<sup>WT</sup>-msfGFP. Red fluorescence represents FM4-64FX membrane  
769 staining.
- 770 f) The cumulative distributions of MreB-msfGFP fluorescence patch sizes for  
771  $\Delta rodZ$  suppressor MreB mutants were intermediate between those of  
772 MreB<sup>WT</sup> and MreB<sup>E276D</sup>. Each MreB patch was defined as a continuous  
773 region larger than the diffraction limit with high GFP signal located within  
774 cell contours.
- 775 g) Patch sizes for various strains varied widely, as indicated by the  
776 cumulative distribution of MreB-msfGFP fluorescence. Strains containing  
777 MreB<sup>E276D</sup>-msfGFP consistently showed distributions indicative of larger  
778 patch sizes ( $p < 10^{-18}$ ,  $t$ -test). Deletion of RodZ alone did not lead to  
779 statistically significant differences in the distribution of MreB patch sizes.
- 780

781 **References**

782

- 783 1. Scheffers, D.-J., and Pinho, M.G. (2005). Bacterial cell wall synthesis: new  
784 insights from localization studies. *Microbiology and molecular biology*  
785 *reviews : MMBR* 69, 585-607.
- 786 2. Höltje, J.V. (1998). Growth of the stress-bearing and shape-maintaining  
787 murein sacculus of *Escherichia coli*. *Microbiology and molecular biology*  
788 *reviews : MMBR* 62, 181-203.
- 789 3. Tropini, C., Lee, T.K., Hsin, J., Desmarais, S.M., Ursell, T., Monds, R.D.,  
790 and Huang, K.C. (2014). Principles of bacterial cell-size determination  
791 revealed by cell-wall synthesis perturbations. *Cell reports* 9, 1-8.
- 792 4. Wang, S., Furchtgott, L., Huang, K.C., and Shaevitz, J.W. (2012). Helical  
793 insertion of peptidoglycan produces chiral ordering of the bacterial cell  
794 wall. *Proceedings of the National Academy of Sciences of the United*  
795 *States of America* 109, E595-604.
- 796 5. van den Ent, F., Amos, L.a., and Löwe, J. (2001). Prokaryotic origin of the  
797 actin cytoskeleton. *Nature* 413, 39-44.
- 798 6. van Teeffelen, S., Wang, S., Furchtgott, L., Huang, K.C., Wingreen, N.S.,  
799 Shaevitz, J.W., and Gitai, Z. (2011). The bacterial actin MreB rotates, and  
800 rotation depends on cell-wall assembly. *Proceedings of the National*  
801 *Academy of Sciences of the United States of America* 108, 15822-15827.
- 802 7. Salje, J., van den Ent, F., de Boer, P., and Löwe, J. (2011). Direct  
803 membrane binding by bacterial actin MreB. *Molecular cell* 43, 478-487.

- 804 8. Lee, T.K., Tropini, C., Hsin, J., Desmarais, S.M., Ursell, T.S., Gong, E.,  
805 Gitai, Z., Monds, R.D., and Huang, K.C. (2014). A dynamically assembled  
806 cell wall synthesis machinery buffers cell growth. *Proceedings of the*  
807 *National Academy of Sciences of the United States of America* *111*, 4554-  
808 4559.
- 809 9. Domínguez-Escobar, J., Chastanet, A., Crevenna, A.H., Fromion, V.,  
810 Wedlich-Söldner, R., and Carballido-López, R. (2011). Processive  
811 movement of MreB-associated cell wall biosynthetic complexes in  
812 bacteria. *Science (New York, N.Y.)* *333*, 225-228.
- 813 10. Garner, E.C., Bernard, R., Wang, W., Zhuang, X., Rudner, D.Z., and  
814 Mitchison, T. (2011). Coupled, circumferential motions of the cell wall  
815 synthesis machinery and MreB filaments in *B. subtilis*. *Science (New York,*  
816 *N.Y.)* *333*, 222-225.
- 817 11. Ursell, T.S., Nguyen, J., Monds, R.D., Colavin, A., Billings, G., Ouzounov,  
818 N., Gitai, Z., Shaevitz, J.W., and Huang, K.C. (2014). Rod-like bacterial  
819 shape is maintained by feedback between cell curvature and cytoskeletal  
820 localization. *Proceedings of the National Academy of Sciences of the*  
821 *United States of America*.
- 822 12. Dye, N.A., Pincus, Z., Fisher, I.C., Shapiro, L., and Theriot, J.A. (2011).  
823 Mutations in the nucleotide binding pocket of MreB can alter cell curvature  
824 and polar morphology in *Caulobacter*. *Molecular microbiology* *81*, 368-  
825 394.

- 826 13. Kruse, T., Møller-Jensen, J., Løbner-Olesen, A., and Gerdes, K. (2003).  
827 Dysfunctional MreB inhibits chromosome segregation in *Escherichia coli*.  
828 *The EMBO journal* 22, 5283-5292.
- 829 14. Monds, R.D., Lee, T.K., Colavin, A., Ursell, T., Quan, S., Cooper, T.F.,  
830 and Huang, K.C. (2014). Systematic Perturbation of Cytoskeletal Function  
831 Reveals a Linear Scaling Relationship between Cell Geometry and  
832 Fitness. *Cell reports* 9, 1528-1537.
- 833 15. Ouzounov, N., Nguyen, J.P., Bratton, B.P., Jacobowitz, D., Gitai, Z., and  
834 Shaevitz, J.W. (2016). MreB Orientation Correlates with Cell Diameter in  
835 *Escherichia coli*. *Biophysical Journal* 111, 1035-1043.
- 836 16. Kruse, T., Bork-Jensen, J., and Gerdes, K. (2005). The morphogenetic  
837 MreBCD proteins of *Escherichia coli* form an essential membrane-bound  
838 complex. *Molecular microbiology* 55, 78-89.
- 839 17. Bendezú, F.O., Hale, C.a., Bernhardt, T.G., and de Boer, P.a.J. (2009).  
840 RodZ (YfgA) is required for proper assembly of the MreB actin  
841 cytoskeleton and cell shape in *E. coli*. *The EMBO journal* 28, 193-204.
- 842 18. Bean, G.J., Flickinger, S.T., Westler, W.M., McCully, M.E., Sept, D.,  
843 Weibel, D.B., and Amann, K.J. (2009). A22 disrupts the bacterial actin  
844 cytoskeleton by directly binding and inducing a low-affinity state in MreB.  
845 *Biochemistry* 48, 4852-4857.
- 846 19. Gitai, Z., Dye, N.A., Reisenauer, A., Wachi, M., and Shapiro, L. (2005).  
847 MreB actin-mediated segregation of a specific region of a bacterial  
848 chromosome. *Cell* 120, 329-341.

- 849 20. Billings, G., Ouzounov, N., Ursell, T., Desmarais, S.M., Shaevitz, J., Gitai,  
850 Z., and Huang, K.C. (2014). De novo morphogenesis in L-forms via  
851 geometric control of cell growth. *Molecular microbiology*, 1-14.
- 852 21. Colavin, A., Hsin, J., and Huang, K.C. (2014). Effects of polymerization  
853 and nucleotide identity on the conformational dynamics of the bacterial  
854 actin homolog MreB. *Proceedings of the National Academy of Sciences of  
855 the United States of America* *111*, 3585-3590.
- 856 22. Sezonov, G., Joseleau-Petit, D., and D'Ari, R. (2007). *Escherichia coli*  
857 physiology in Luria-Bertani broth. *Journal of bacteriology* *189*, 8746-8749.
- 858 23. Schaechter, M., MaalOe, O., and Kjeldgaard, N.O. (1958). Dependency  
859 on Medium and Temperature of Cell Size and Chemical Composition  
860 during Balanced Growth of *Salmonella typhimurium*. *Journal of General  
861 Microbiology* *19*, 592-606.
- 862 24. Peters, J.M., Colavin, A., Shi, H., Czarny, T.L., Larson, M.H., Wong, S.,  
863 Hawkins, J.S., Lu, C.H., Koo, B.M., Marta, E., et al. (2016). A  
864 Comprehensive, CRISPR-based Functional Analysis of Essential Genes  
865 in Bacteria. *Cell* *165*, 1493-1506.
- 866 25. Auer, G.K., Lee, T.K., Rajendram, M., Cesar, S., Miguel, A., Huang, K.C.,  
867 and Weibel, D.B. (2016). Mechanical Genomics Identifies Diverse  
868 Modulators of Bacterial Cell Stiffness. *Cell systems* *2*, 402-411.
- 869 26. Baba, T., Ara, T., Hasegawa, M., Takai, Y., Okumura, Y., Baba, M.,  
870 Datsenko, K.A., Tomita, M., Wanner, B.L., and Mori, H. (2006).

- 871 Construction of *Escherichia coli* K-12 in-frame, single-gene knockout  
872 mutants: the Keio collection. *Molecular systems biology* 2, 2006 0008.
- 873 27. Alyahya, S.A., Alexander, R., Costa, T., Henriques, A.O., Emonet, T., and  
874 Jacobs-Wagner, C. (2009). RodZ, a component of the bacterial core  
875 morphogenic apparatus. *Proceedings of the National Academy of*  
876 *Sciences of the United States of America* 106, 1239-1244.
- 877 28. Shiomi, D., Sakai, M., and Niki, H. (2008). Determination of bacterial rod  
878 shape by a novel cytoskeletal membrane protein. *The EMBO journal* 27,  
879 3081-3091.
- 880 29. Ursell, T., Lee, T.K., Shiomi, D., Shi, H., Tropini, C., Monds, R.D., Colavin,  
881 A., Billings, G., Bhaya-Grossman, I., Broxton, M., et al. (2016). Rapid,  
882 precise quantification of bacterial cellular dimensions across a genomic-  
883 scale knockout library.
- 884 30. Shiomi, D., Toyoda, A., Aizu, T., Ejima, F., Fujiyama, A., Shini, T., Kohara,  
885 Y., and Niki, H. (2013). Mutations in cell elongation genes *mreB*, *mrdA*  
886 and *mrdB* suppress the shape defect of RodZ-deficient cells. *Molecular*  
887 *microbiology* 87, 1029-1044.
- 888 31. Li, G.W., Burkhardt, D., Gross, C., and Weissman, J.S. (2014).  
889 Quantifying absolute protein synthesis rates reveals principles underlying  
890 allocation of cellular resources. *Cell* 157, 624-635.
- 891 32. Schmidt, A., Kochanowski, K., Vedelaar, S., Ahrne, E., Volkmer, B.,  
892 Callipo, L., Knoops, K., Bauer, M., Aebersold, R., and Heinemann, M.

- 893 (2015). The quantitative and condition-dependent *Escherichia coli*  
894 proteome. *Nature biotechnology* 34, 104-110.
- 895 33. Van den Ent, F., Izoré, T., Bharat, T.A., Johnson, C.M., and Löwe, J.  
896 (2014). Bacterial actin MreB forms antiparallel double filaments. *eLife*,  
897 e02634.
- 898 34. de Pedro, M.A., Young, K.D., Holtje, J.V., and Schwarz, H. (2003).  
899 Branching of *Escherichia coli* cells arises from multiple sites of inert  
900 peptidoglycan. *Journal of bacteriology* 185, 1147-1152.
- 901 35. Hedge, P.J., and Spratt, B.G. (1985). Amino acid substitutions that reduce  
902 the affinity of penicillin-binding protein 3 of *Escherichia coli* for cephalexin.  
903 *European journal of biochemistry / FEBS* 151, 111-121.
- 904 36. Morgenstein, R.M., Bratton, B.P., Nguyen, J.P., Ouzounov, N., Shaeviz,  
905 J.W., and Gitai, Z. (2015). RodZ links MreB to cell wall synthesis to  
906 mediate MreB rotation and robust morphogenesis. *Proceedings of the*  
907 *National Academy of Sciences of the United States of America* 112,  
908 12510-12515.
- 909 37. Fenton, A.K., and Gerdes, K. (2013). Direct interaction of FtsZ and MreB  
910 is required for septum synthesis and cell division in *Escherichia coli*. *The*  
911 *EMBO journal* 32, 1953-1965.
- 912 38. Hsin, J., Gopinathan, A., and Huang, K.C. (2012). Nucleotide-dependent  
913 conformations of FtsZ dimers and force generation observed through  
914 molecular dynamics simulations. *Proceedings of the National Academy of*  
915 *Sciences of the United States of America* 109, 9432-9437.

- 916 39. Li, Y., Hsin, J., Zhao, L., Cheng, Y., Shang, W., Huang, K.C., Wang, H.W.,  
917 and Ye, S. (2013). FtsZ protofilaments use a hinge-opening mechanism  
918 for constrictive force generation. *Science* 341, 392-395.
- 919 40. Winder, S.J., and Ayscough, K.R. (2005). Actin-binding proteins. *Journal*  
920 *of cell science* 118, 651-654.
- 921 41. Itoh, T., Erdmann, K.S., Roux, A., Habermann, B., Werner, H., and De  
922 Camilli, P. (2005). Dynamin and the actin cytoskeleton cooperatively  
923 regulate plasma membrane invagination by BAR and F-BAR proteins.  
924 *Developmental cell* 9, 791-804.
- 925 42. Harris, L.K., and Theriot, J.A. (2016). Relative Rates of Surface and  
926 Volume Synthesis Set Bacterial Cell Size. *Cell* 165, 1479-1492.
- 927 43. Wallden, M., Fange, D., Lundius, E.G., Baltekin, O., and Elf, J. (2016).  
928 The Synchronization of Replication and Division Cycles in Individual E.  
929 coli Cells. *Cell* 166, 729-739.
- 930 44. Sharan, S.K., Thomason, L.C., Kuznetsov, S.G., and Court, D.L. (2009).  
931 Recombineering: a homologous recombination-based method of genetic  
932 engineering. *Nat Protoc* 4, 206-223.
- 933 45. Edelstein, A., Amodaj, N., Hoover, K., Vale, R., and Stuurman, N. (2010).  
934 Computer control of microscopes using microManager. *Current protocols*  
935 *in molecular biology* / edited by Frederick M. Ausubel ... [et al.] *Chapter*  
936 *14, Unit14* 20.
- 937 46. Phillips, J.C., Braun, R., Wang, W., Gumbart, J., Tajkhorshid, E., Villa, E.,  
938 Chipot, C., Skeel, R.D., Kale, L., and Schulten, K. (2005). Scalable



- 939           molecular dynamics with NAMD. *Journal of computational chemistry* *26*,  
940           1781-1802.
- 941   47.   MacKerell, A.D., Bashford, D., Bellott, Dunbrack, R.L., Evanseck, J.D.,  
942           Field, M.J., Fischer, S., Gao, J., Guo, H., Ha, S., et al. (1998). All-Atom  
943           Empirical Potential for Molecular Modeling and Dynamics Studies of  
944           Proteins. *The Journal of Physical Chemistry B* *102*, 3586-3616.
- 945   48.   Foloppe, N., and MacKerell, J.A.D. (2000). All-atom empirical force field  
946           for nucleic acids: I. Parameter optimization based on small molecule and  
947           condensed phase macromolecular target data. *Journal of computational*  
948           *chemistry* *21*, 86-104.
- 949   49.   Jorgensen, W.L., Chandrasekhar, J., Madura, J.D., Impey, R.W., and  
950           Klein, M.L. (1983). Comparison of simple potential functions for simulating  
951           liquid water. *The Journal of Chemical Physics* *79*, 926-935.
- 952   50.   Tuckerman, M., Berne, B.J., and Martyna, G.J. (1992). Reversible multiple  
953           time scale molecular dynamics. *The Journal of Chemical Physics* *97*,  
954           1990-2001.
- 955   51.   Feller, S.E., Zhang, Y., Pastor, R.W., and Brooks, B.R. (1995). Constant  
956           pressure molecular dynamics simulation: The Langevin piston method.  
957           *The Journal of Chemical Physics* *103*, 4613-4621.
- 958   52.   van den Ent, F., Amos, L.A., and Lowe, J. (2001). Prokaryotic origin of the  
959           actin cytoskeleton. *Nature* *413*, 39-44.
- 960   53.   Humphrey, W., Dalke, A., and Schulten, K. (1996). VMD: visual molecular  
961           dynamics. *Journal of molecular graphics* *14*, 33-38, 27-38.

962 54. Schindelin, J., Arganda-Carreras, I., Frise, E., Kaynig, V., Longair, M.,  
963 Pietzsch, T., Preibisch, S., Rueden, C., Saalfeld, S., Schmid, B., et al.  
964 (2012). Fiji: an open-source platform for biological-image analysis. *Nature*  
965 *methods* 9, 676-682.  
966
